# Supplementary material for: SGLT‐1‐specific inhibition ameliorates renal failure and alters the gut microbial community in mice with adenine‐induced renal failure
Source: PubMed Central journal article supplement (PMC8683788; doi:10.14814/phy2.15092), 2021-12-18
Supplement: PHY2-9-e15092-s001.pdf [file PHY2-9-e15092-s001.pdf]

# Supplementary Data set

**Title:** SGLT-1-specific inhibition ameliorates renal failure and alters the gut microbial community in mice with adenine-induced renal failure

Hsin-Jung Ho\*, Koichi Kikuchi\*, Daiki Oikawa\*,  
Shun Watanabe\*, Yoshitomi Kanemitsu, Daisuke Saigusa,  
Ryota Kujirai, Wakako Ohtsubo, Mariko Ichijo,  
Yukako Akiyama, Eikan Mishima, Yoshitsugu Oikawa, Tetsuro  
Matsuhashi, Takafumi Toyohara, Chitose Suzuki, Takehiro Suzuki,  
Nariyasu Mano, Yoshiteru Kagawa, Yuji Ohwada, Takane Katayama,  
Toru Nakayama, Yoshihisa Tomioka and Takaaki Abe

# Supplementary Figure 1

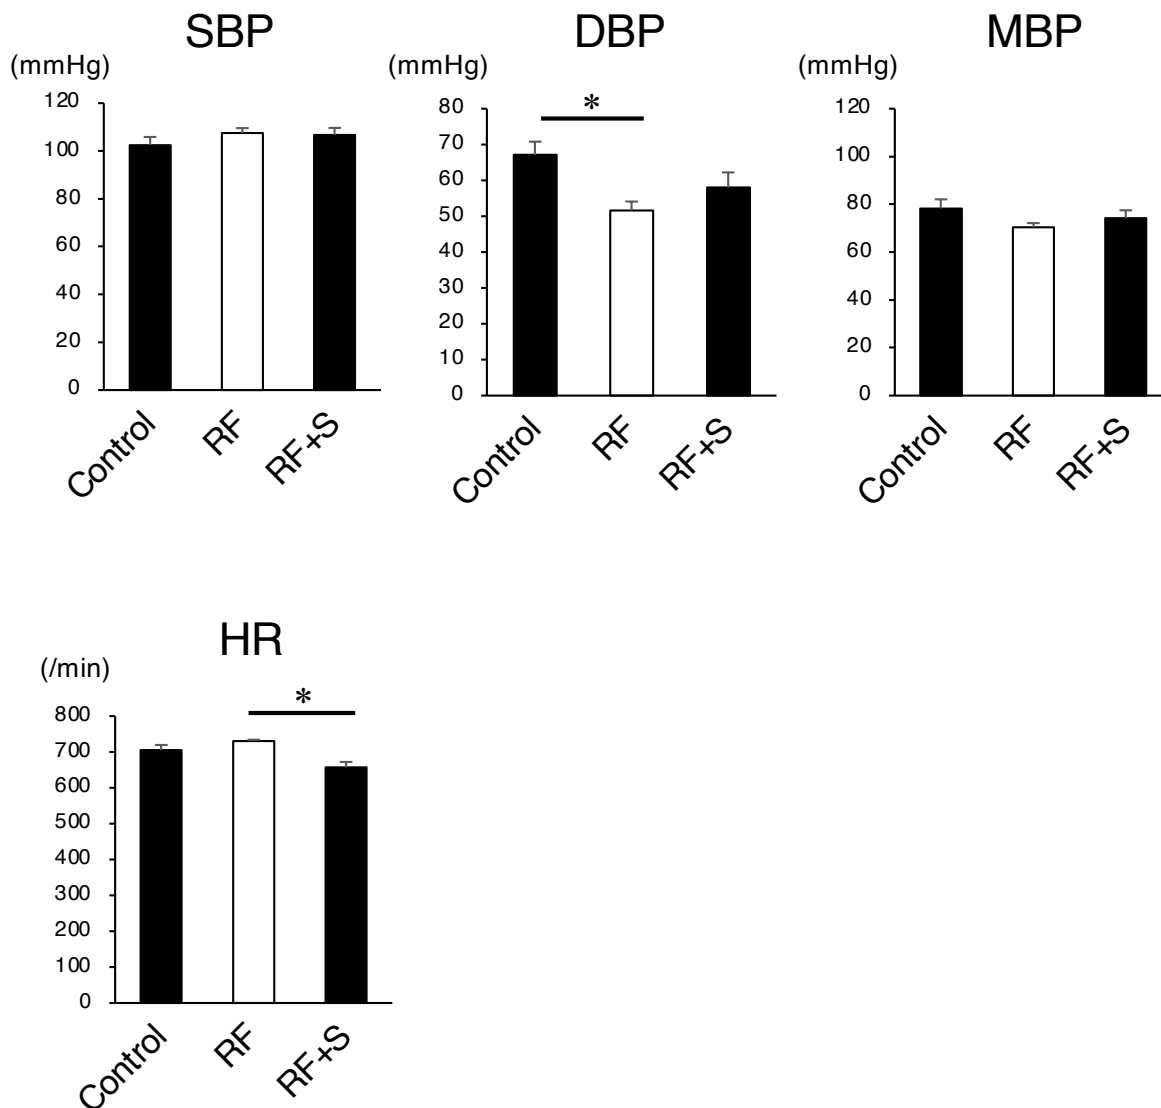

Blood pressure and heart rate were measured by MK-2000ST (Muromachi, Japan). Control (n=6), RF: renal failure (n=6), RF + S: renal failure with SGL5213 treatment (n=6) SBP: systolic blood pressure, DBP: diastolic blood pressure, MBP: mean blood pressure HR: heart rate.

Data were shown by mean  $\pm$  SEM.

\* $p < 0.05$ , Ordinary one-way ANOVA followed by Dunnett's multiple comparison test vs RF.

# Supplementary Figure 2

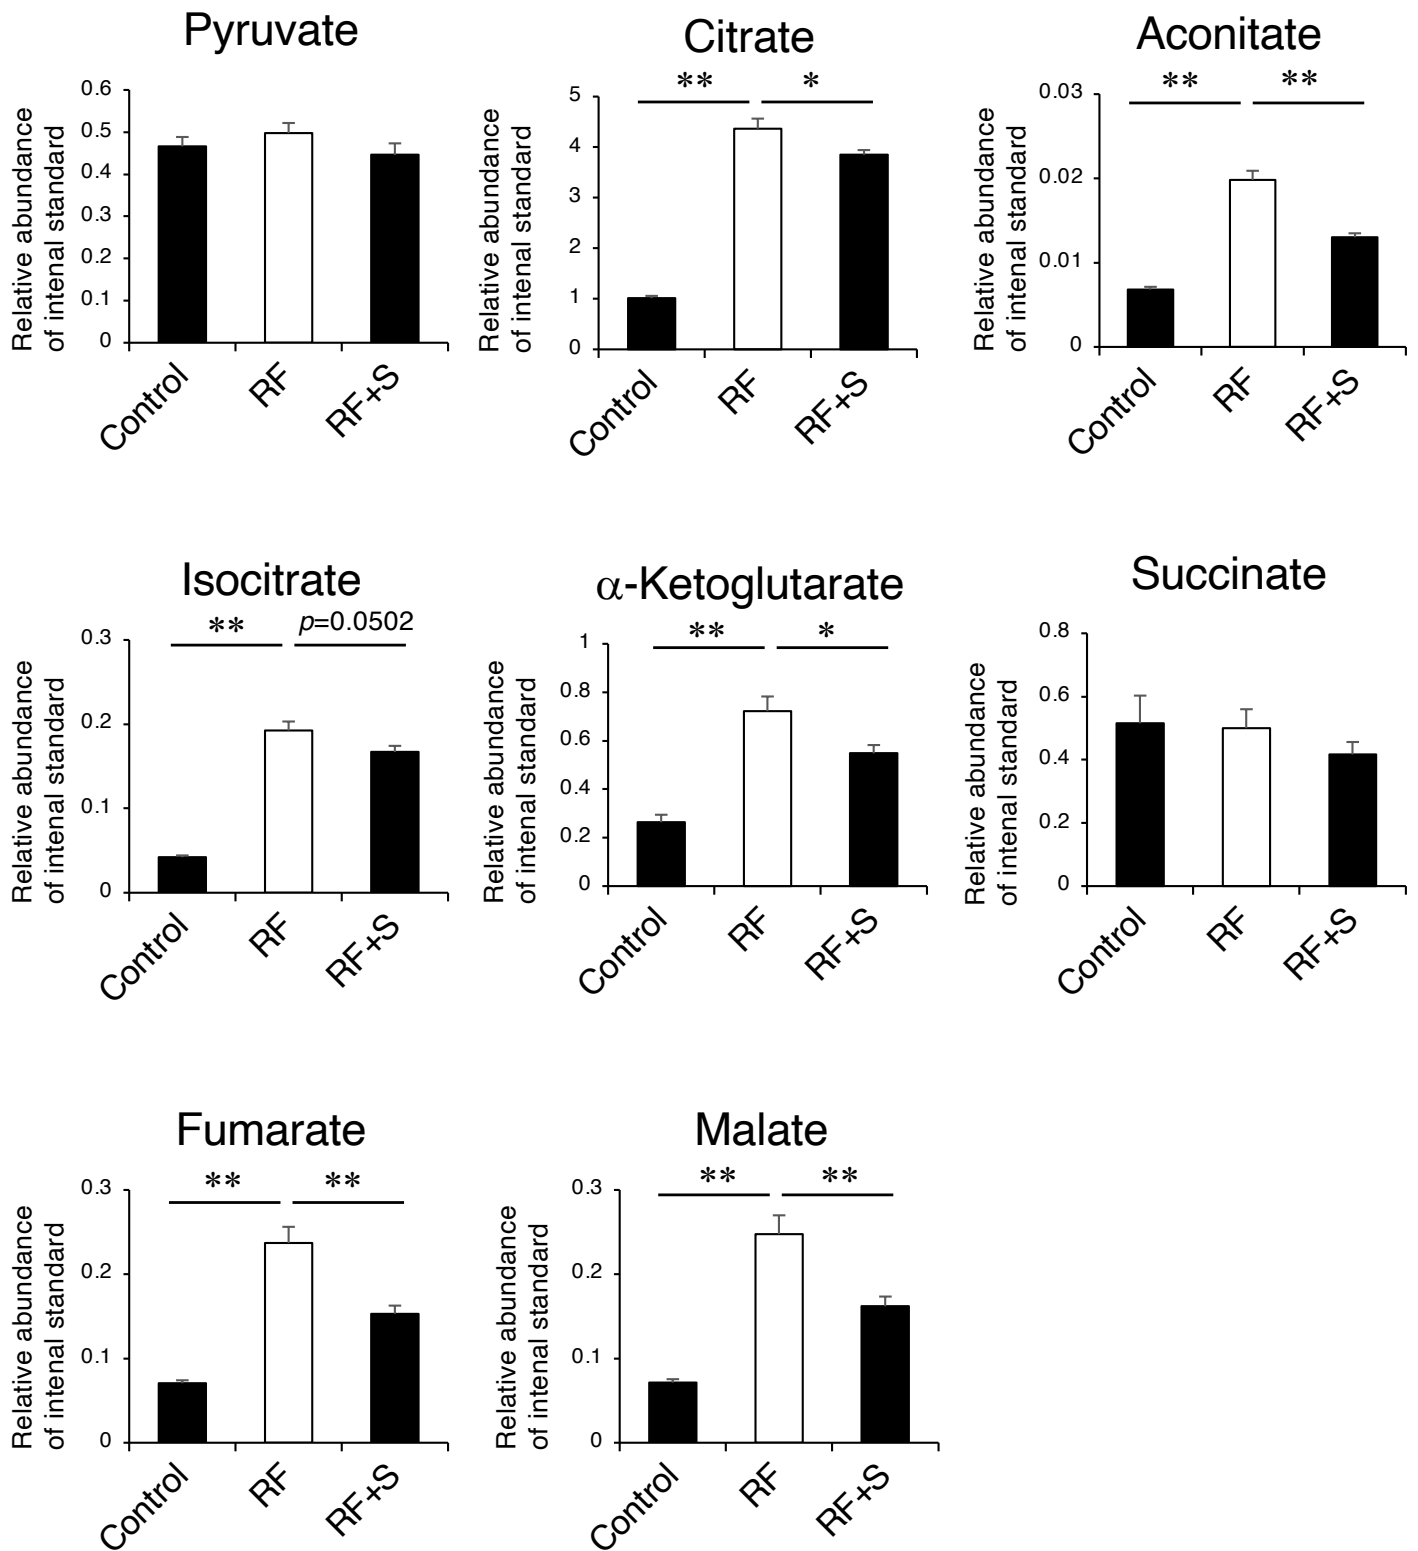

Internal standard: 2-Isopropylmalic acid-3TMS

Mean  $\pm$  SEM. \* $p$ <0.05, \*\* $p$ <0.01 Ordinary one-way ANOVA followed by Dunnett's multiple comparison test vs RF.

# Supplementary Figure 3

## phylum

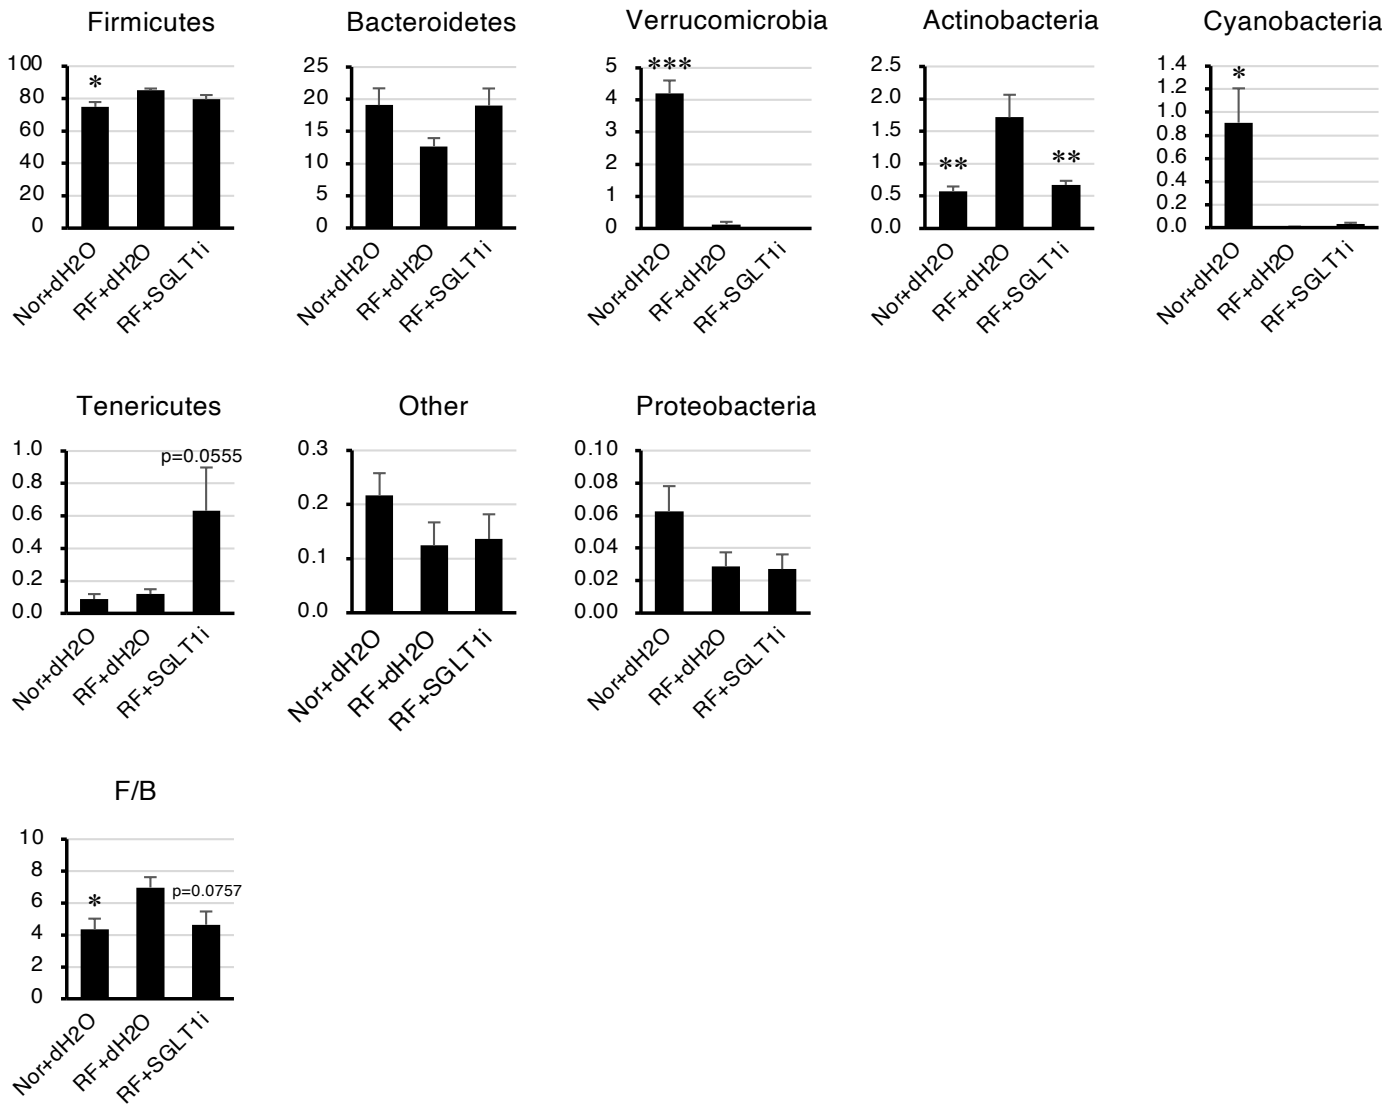

# Supplementary Figure 4

## class

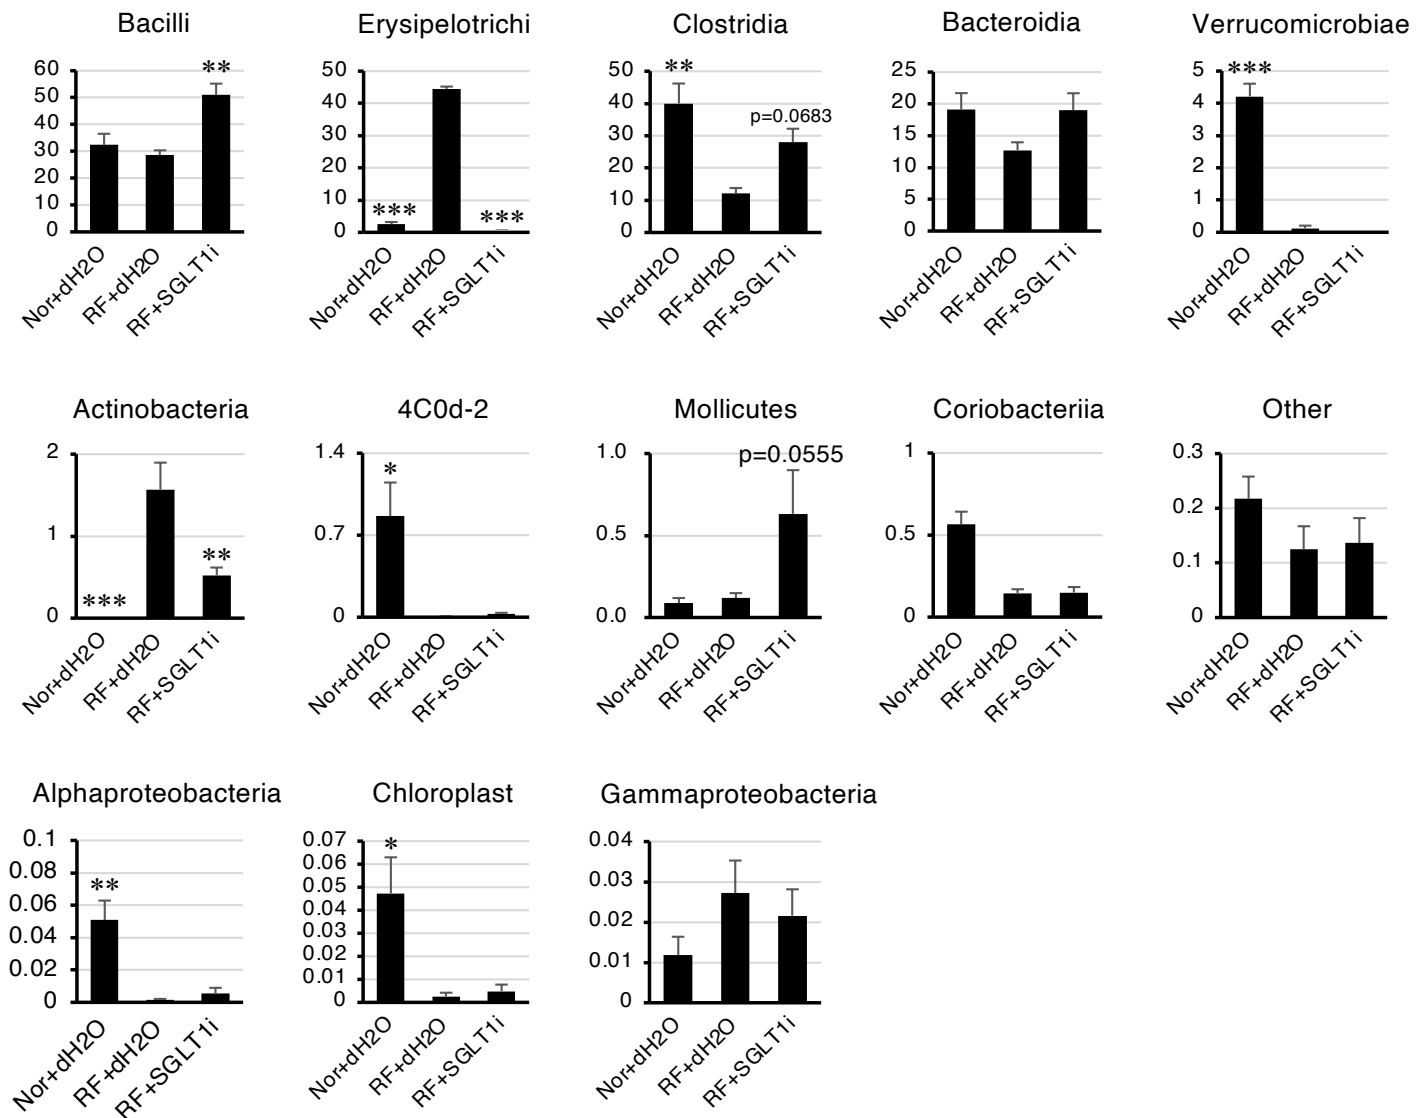

# Supplementary Figure 5

## order

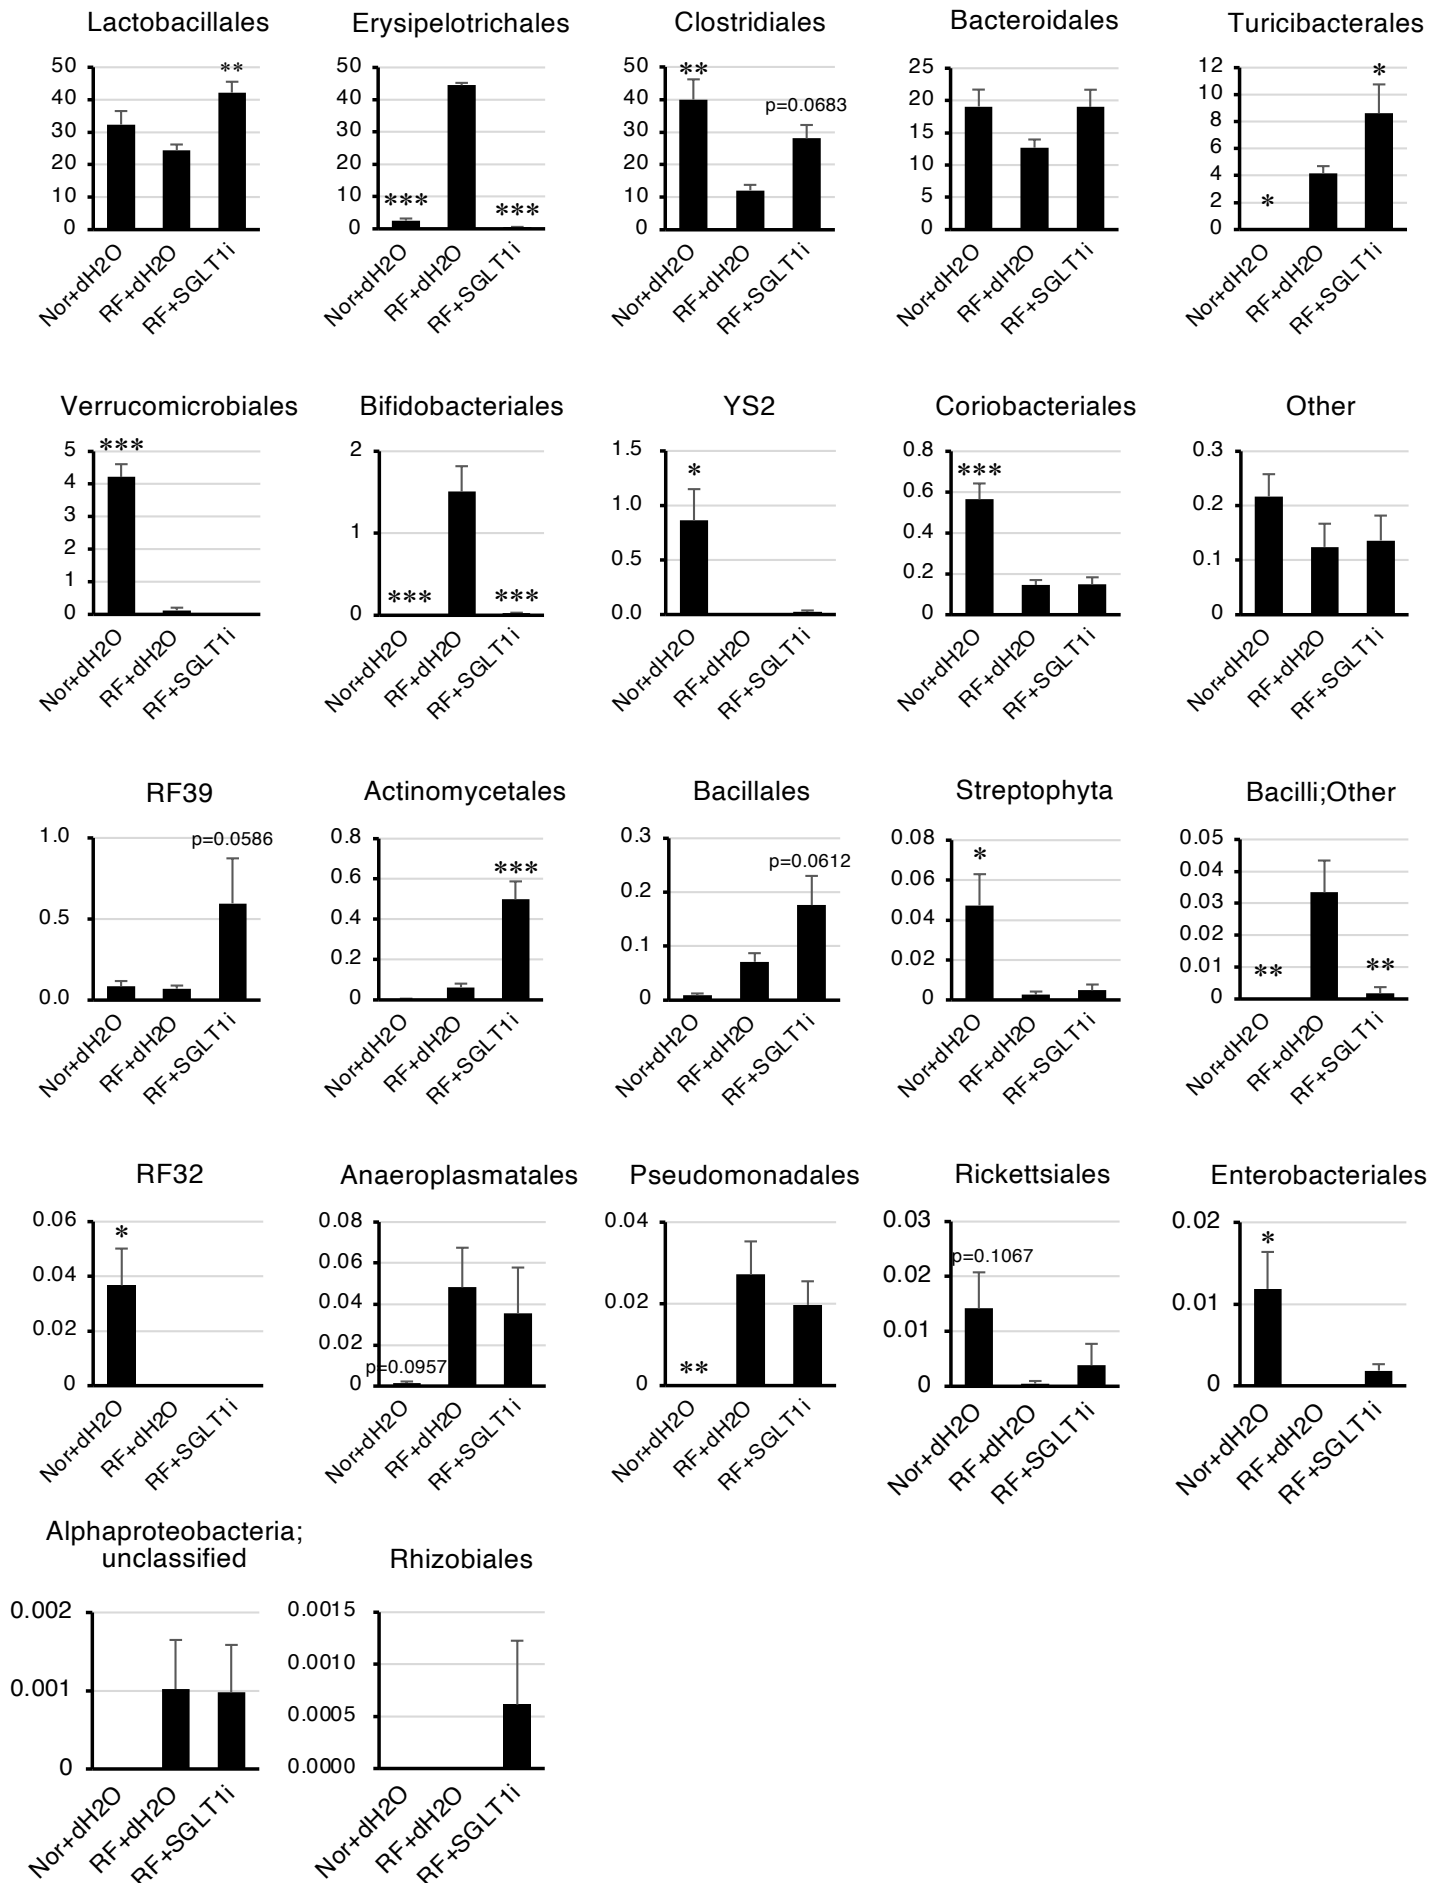

# Supplementary Figure 6-1

## family

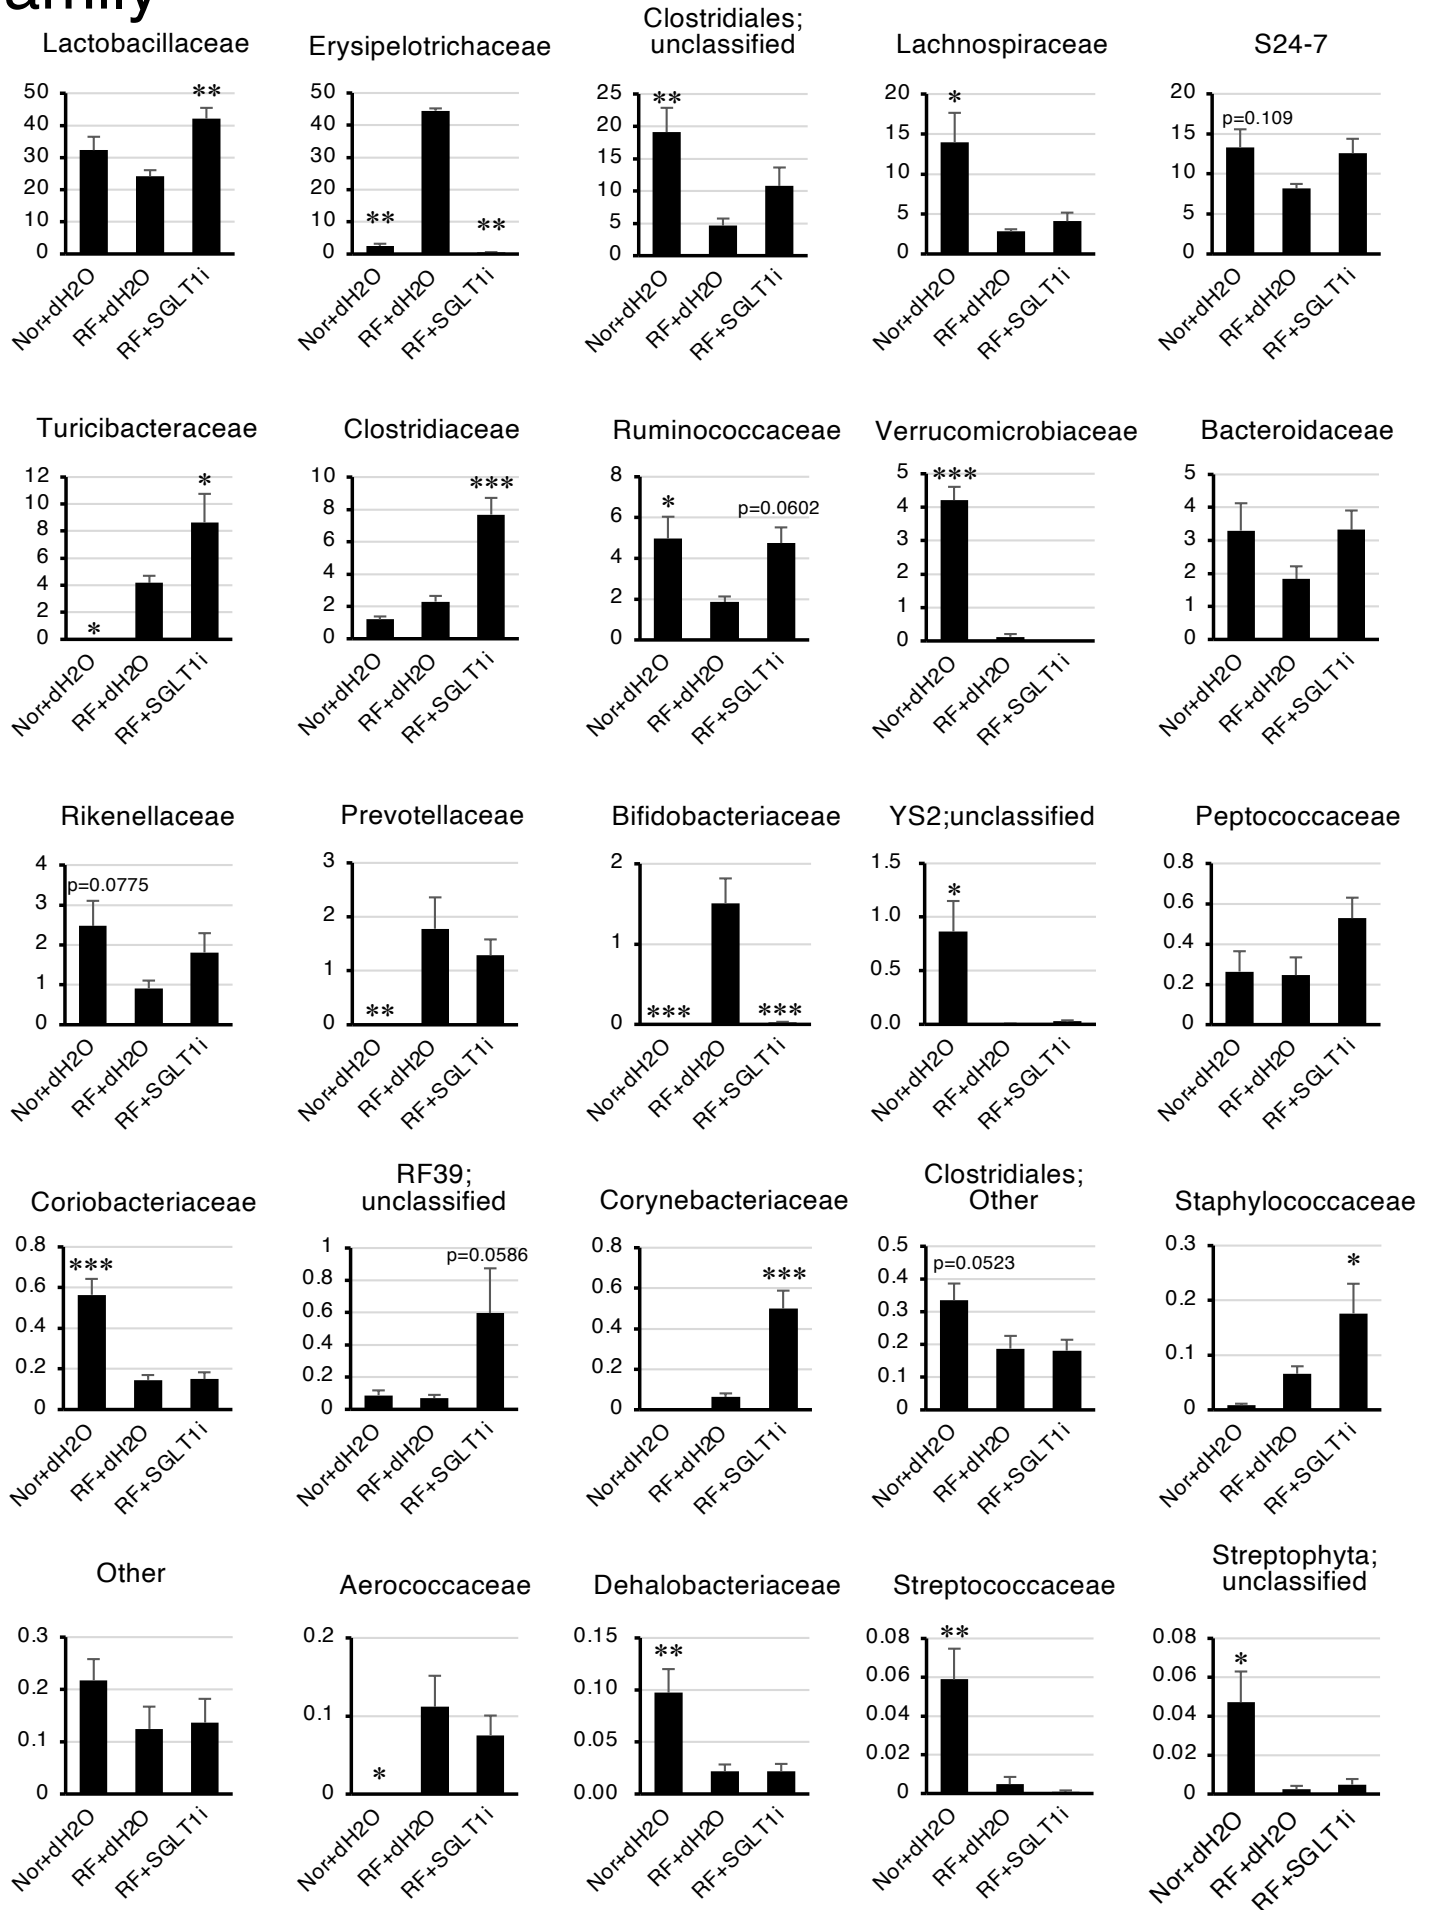

# Supplementary Figure 6-2

## family

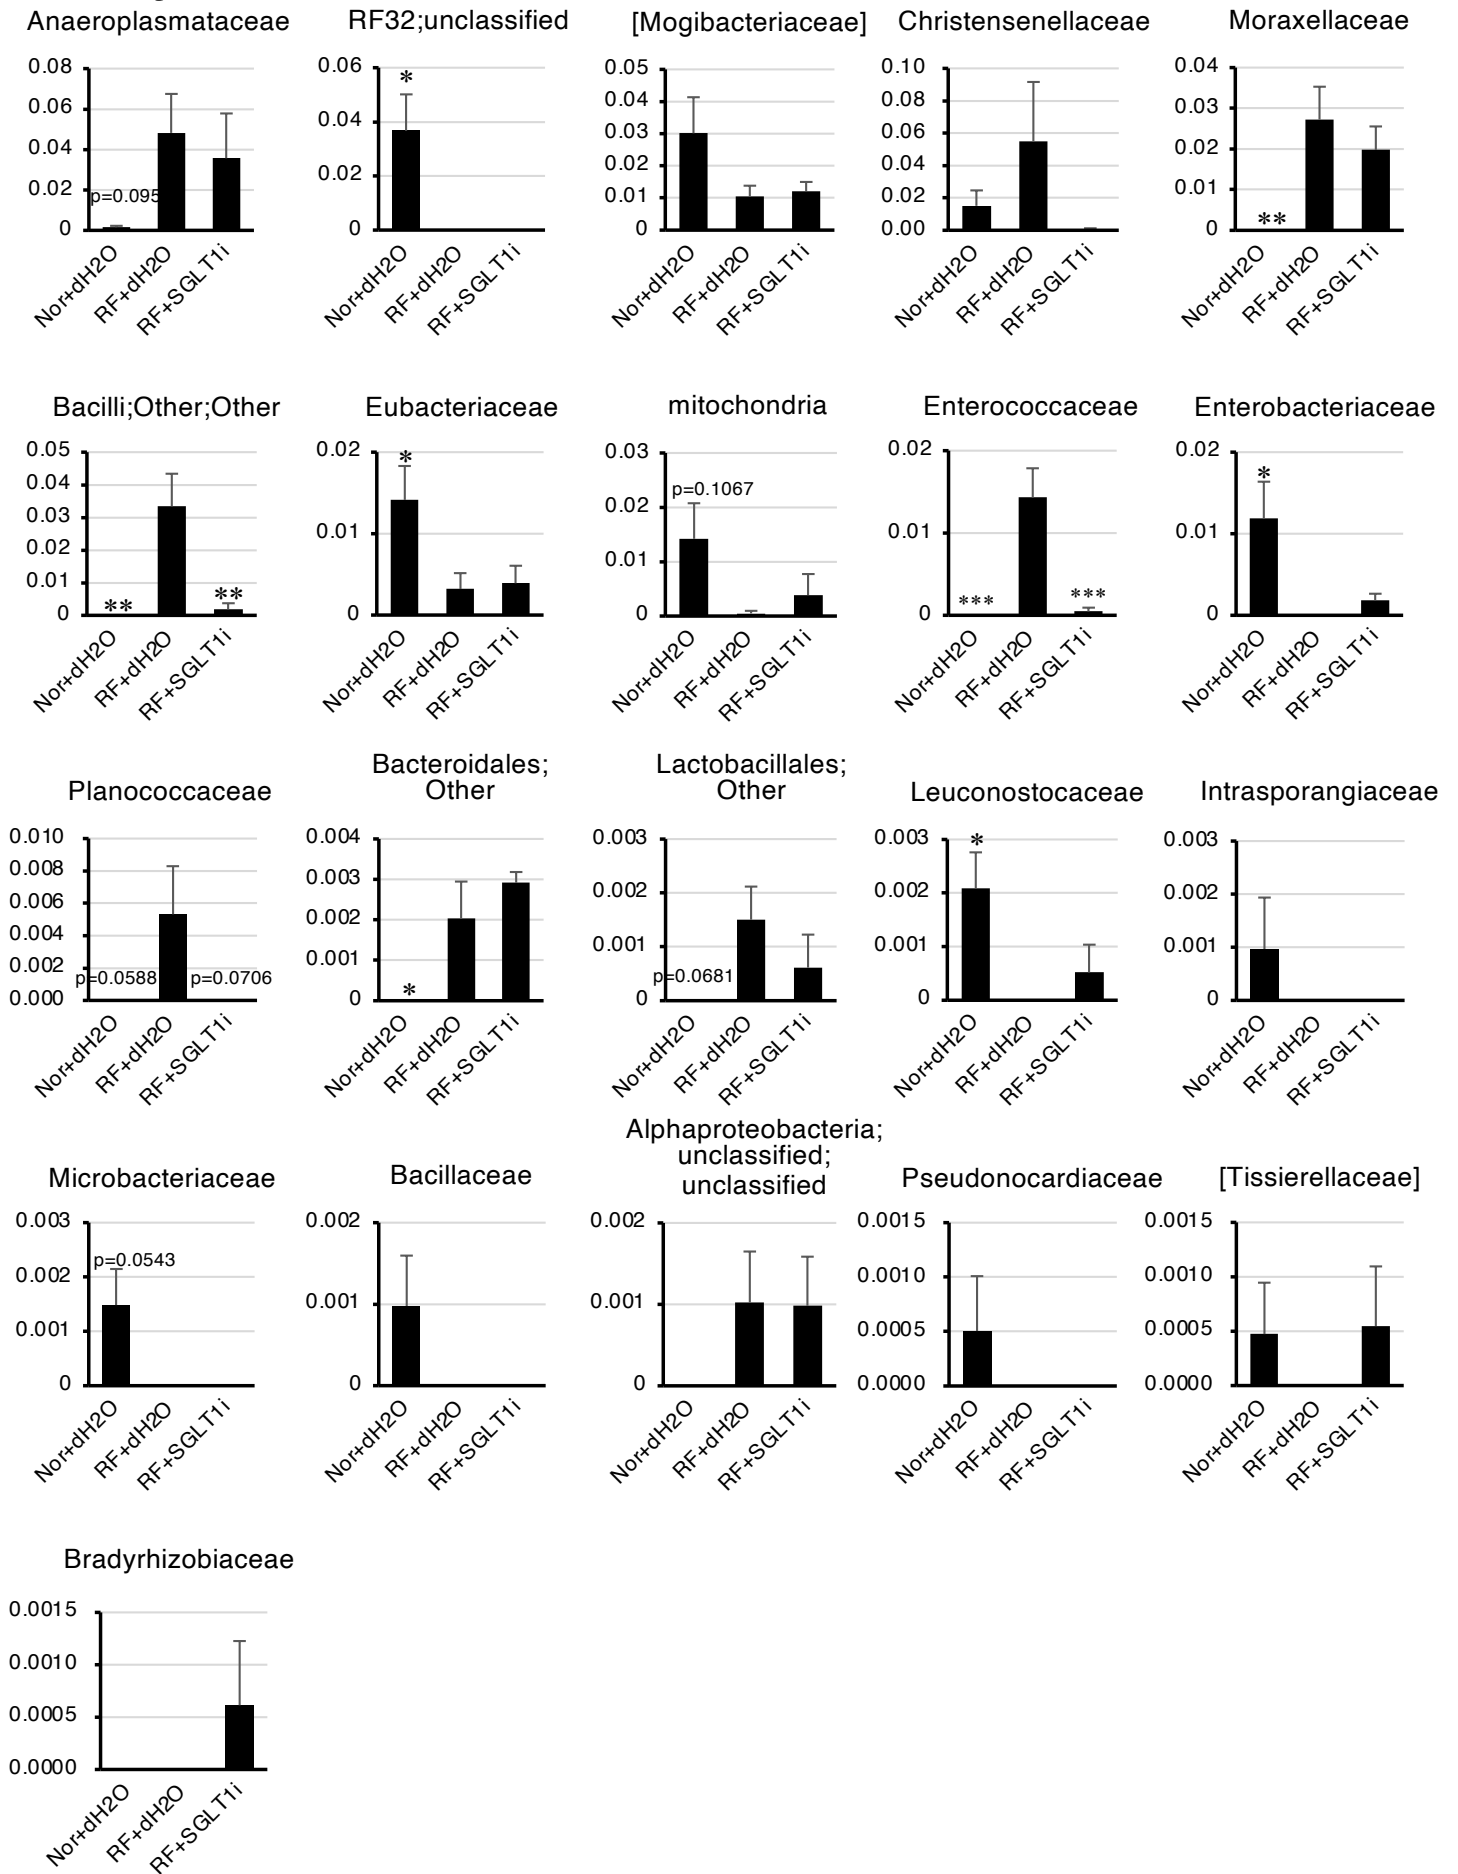



# Supplementary Figure 7-1

## genus

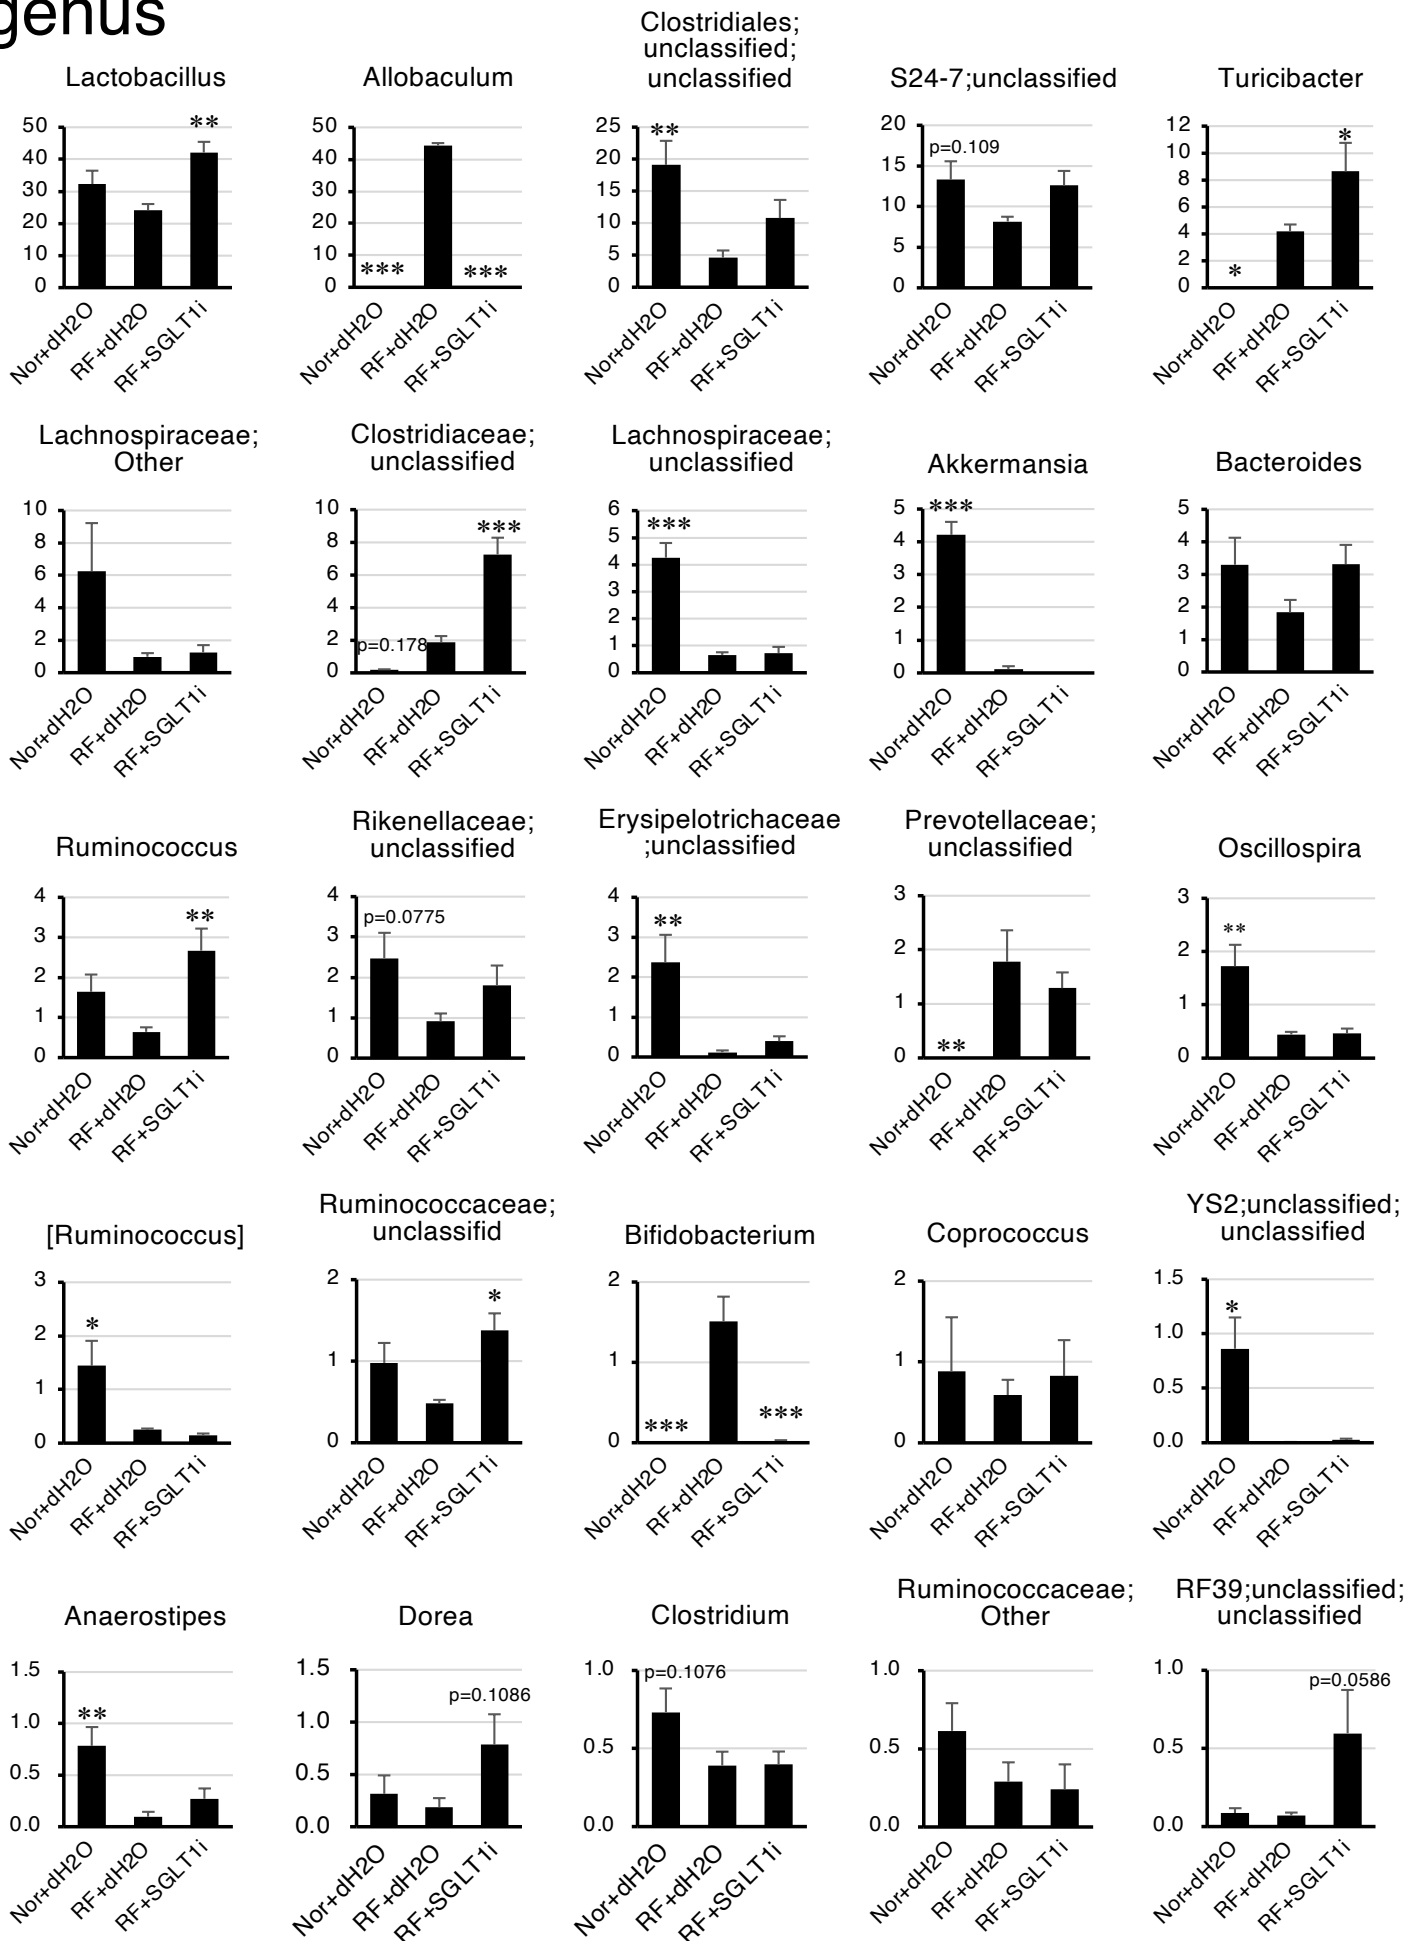

# Supplementary Figure 7-2

## genus

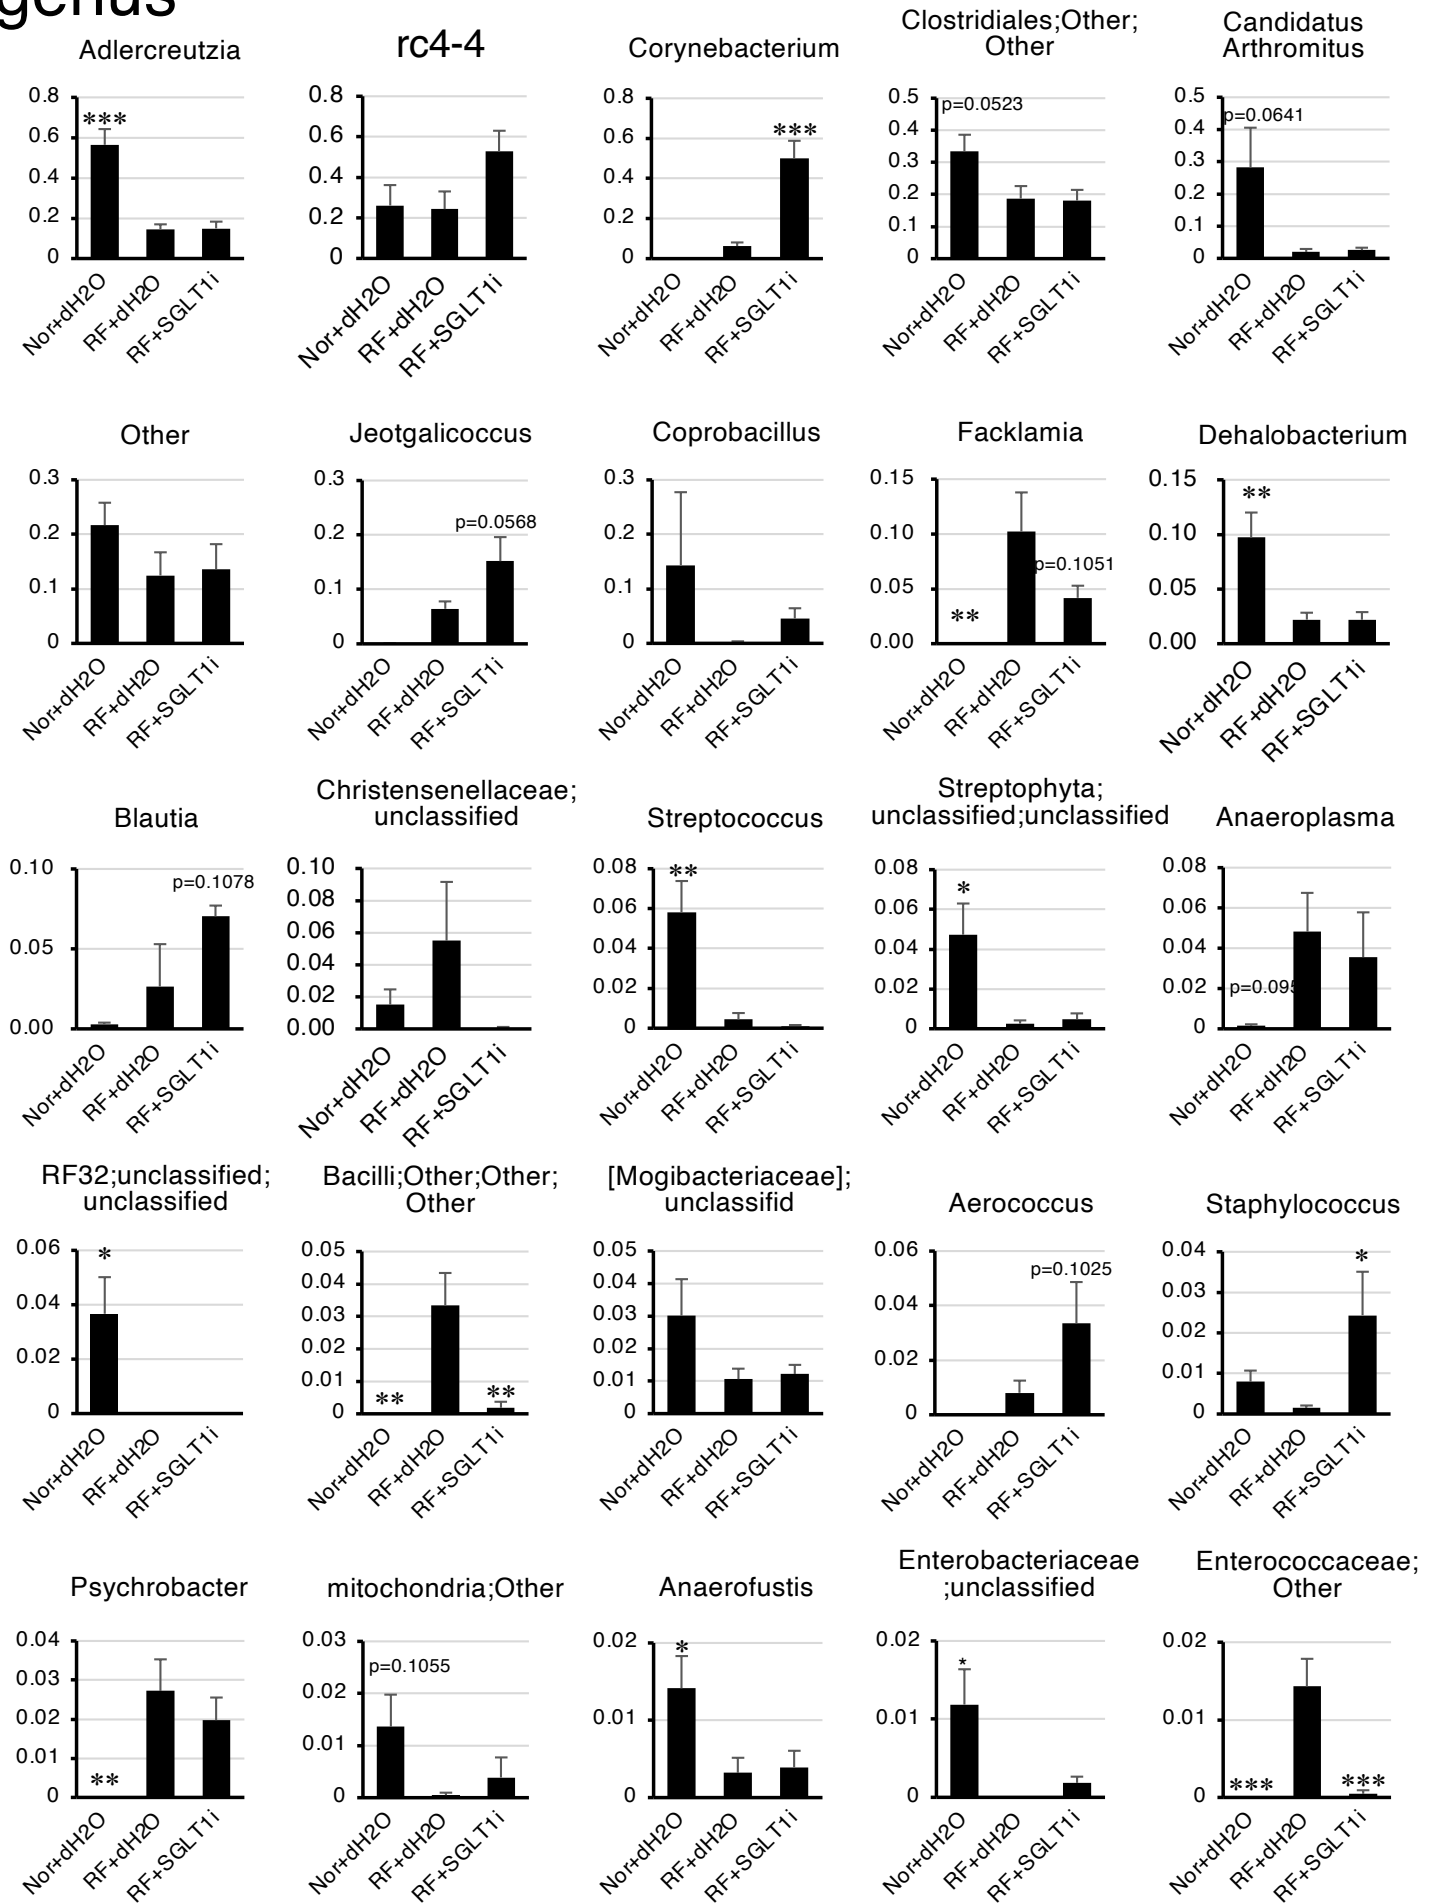

# Supplementary Figure 7-3

## genus

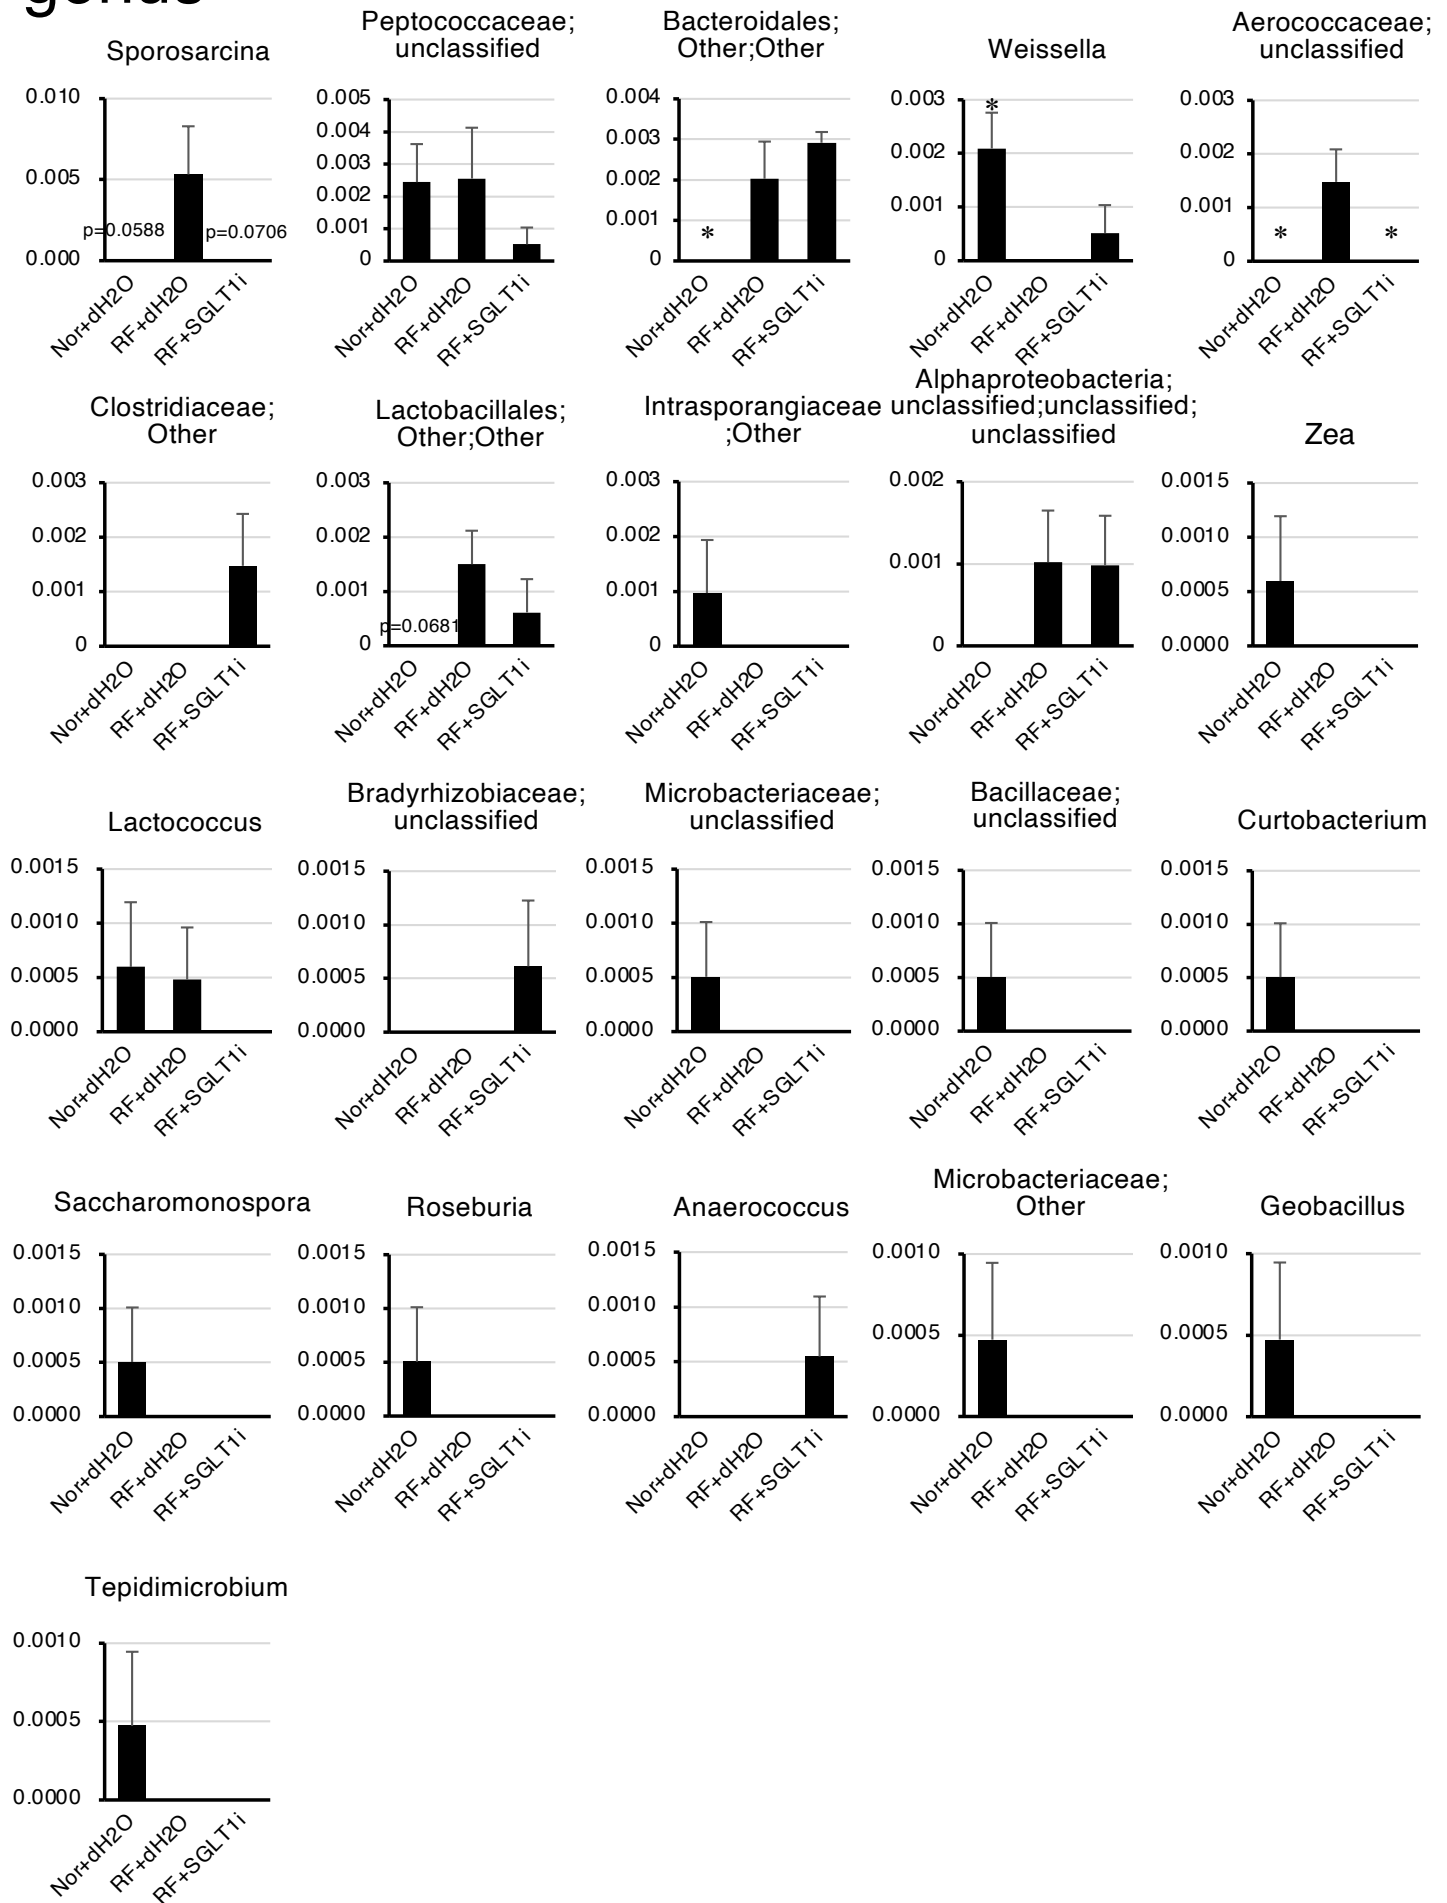

# Supplementary Table 1

## Taqman Gene Expression Assays

|               |               |
|---------------|---------------|
| <i>Ccl2</i>   | Mm00441242_m1 |
| <i>Emr1</i>   | Mm00802529_m1 |
| <i>Tgfb1</i>  | Mm01178820_m1 |
| <i>Col1a1</i> | Mm00801666_g1 |
| <i>Acta2</i>  | Mm00725412_s1 |
| <i>Cd68</i>   | Mm03047343_m1 |

### **Supplementary Table 1**

List of primers used in the PCR analysis. Primers were purchased from Applied Biosystems. The sequences of the primers and probes are certificated by the company, but not open by company policy.
